# Supplementary material for: MicroRNA-192-5p downregulates Fat Mass and Obesity-associated Protein to aggravate renal ischemia/reperfusion injury
Source: PubMed Central journal article supplement — Ren Fail. 2023 Dec 4;45(2):2285869. doi: 10.1080/0886022X.2023.2285869 (PMC11001322; doi:10.1080/0886022x.2023.2285869), 2023-12-04
Supplement: IRNF_A_2285869_SM8673.pdf [file IRNF_A_2285869_SM8673.pdf]

**Supplementary Table 1 The primer sequences for qRT-PCR**

| <b>Gene</b>          | <b>Forward (5'-3')</b> | <b>Reverse (5'-3')</b>  |
|----------------------|------------------------|-------------------------|
| human miR-192-5p     | GCGGCGGCTGACCTATGAATTG | ATCCAGTGCAGGGTCCGAGG    |
| human FTO            | TGGCAGAGTGCTCAACAG     | TGCAGGCTCAAAGGATT       |
| human $\beta$ -actin | CATGTACGTTGCTATCCAGGC  | CATGTACGTTGCTATCCAGGC   |
| human U6             | AAAGCAAATCATCGGACGACC  | GTACAACACATTGTTTCCTCGGA |
| mouse miR-192-5p     | CTGACCTATGAATTGACAGCC  | GAGAAGATTAGCATGGCCC     |
| mouse U6             | ATGGGTCGAAGTCGTAGCC    | TTCTCGGCGTCTTCTTCTCG    |
