# Supplementary material for: MicroRNA-192-5p downregulates Fat Mass and Obesity-associated Protein to aggravate renal ischemia/reperfusion injury
Source: PubMed Central journal article supplement — Ren Fail. 2023 Dec 4;45(2):2285869. doi: 10.1080/0886022X.2023.2285869 (PMC11001322; doi:10.1080/0886022x.2023.2285869), 2023-12-04
Supplement: IRNF_A_2285869_SM8680.pdf [file IRNF_A_2285869_SM8680.pdf]

**Supplementary Table 2 Antibodies' information**

| <b>Antibodies</b> | <b>Source</b> | <b>Identifier</b> |
|-------------------|---------------|-------------------|
| FTO               | Abcam         | Cat# ab94482      |
| LC3B              | Abcam         | Cat# ab48394      |
| p62               | Abcam         | Cat# ab109012     |
| $\beta$ -actin    | Abcam         | Cat# ab8227       |
