# Supplementary material for: MicroRNA-192-5p downregulates Fat Mass and Obesity-associated Protein to aggravate renal ischemia/reperfusion injury
Source: PubMed Central journal article supplement — Ren Fail. 2023 Dec 4;45(2):2285869. doi: 10.1080/0886022X.2023.2285869 (PMC11001322; doi:10.1080/0886022x.2023.2285869), 2023-12-04
Supplement: IRNF_A_2285869_SM8683.pdf [file IRNF_A_2285869_SM8683.pdf]

**Supplementary Table 3 Down-regulated mRNAs in microarray GSE131454**

| <b>Gene</b>   | <b>adj.P.Val</b> | <b>P.Value</b> | <b>t</b>   | <b>B</b> | <b>logFC</b> |
|---------------|------------------|----------------|------------|----------|--------------|
| Dlgap5        | 0.2167           | 0.00010586     | -10.248781 | 1.53714  | -1.1167555   |
| Plch1         | 0.2167           | 0.00013387     | -9.7865545 | 1.38554  | -1.0986564   |
| Il6           | 0.2167           | 0.00016239     | -9.4204706 | 1.25636  | -1.7937684   |
| P2rx7         | 0.2184           | 0.00061944     | -7.1997065 | 0.25724  | -1.0265856   |
| Mapk4         | 0.2296           | 0.0009029      | -6.6623424 | -0.05404 | -1.1067949   |
| Gm7247        | 0.2296           | 0.00091062     | -6.6505918 | -0.06122 | -2.8465785   |
| Inpp5a        | 0.2367           | 0.00115605     | -6.3280736 | -0.26459 | -1.2850163   |
| Tgfr2         | 0.2476           | 0.00139737     | -6.0808811 | -0.42931 | -1.4006253   |
| Cenpw         | 0.2532           | 0.00223819     | -5.49909   | -0.84975 | -1.0109497   |
| Ccdc14        | 0.2563           | 0.0028513      | -5.216895  | -1.07149 | -1.1503881   |
| Oas1h         | 0.2563           | 0.00308587     | -5.127071  | -1.14466 | -1.2047293   |
| Milr1         | 0.2563           | 0.0033014      | -5.051243  | -1.20743 | -1.1225327   |
| Clec4n        | 0.2563           | 0.00344529     | -5.0037394 | -1.24723 | -1.8626029   |
| Hmgal         | 0.2563           | 0.00366932     | -4.9341625 | -1.30617 | -1.7799485   |
| Sgsh          | 0.2563           | 0.00367645     | -4.9320321 | -1.30799 | -1.0492711   |
| Cxcl2         | 0.2563           | 0.00391431     | -4.8634866 | -1.36687 | -4.7272626   |
| Olfir1509     | 0.2563           | 0.00402812     | -4.8323702 | -1.39385 | -1.085113    |
| Hgf           | 0.2583           | 0.00416353     | -4.7966432 | -1.42503 | -1.0809624   |
| Smpd4         | 0.2583           | 0.00451511     | -4.7098043 | -1.50172 | -1.5572379   |
| Zfp513        | 0.2583           | 0.00483314     | -4.637715  | -1.56635 | -1.3943012   |
| Nlrp5         | 0.2583           | 0.00504308     | -4.5930545 | -1.60684 | -1.1149739   |
| Tamalin       | 0.2583           | 0.00523485     | -4.5540897 | -1.64245 | -1.1258771   |
| Tmem147os     | 0.2583           | 0.00524303     | -4.5524644 | -1.64394 | -2.9204656   |
| Plec          | 0.2583           | 0.00528351     | -4.5444636 | -1.65128 | -1.1115638   |
| Cdc7          | 0.2583           | 0.00551566     | -4.4999    | -1.6924  | -1.6606081   |
| Ccne2         | 0.2593           | 0.00583284     | -4.4423796 | -1.74599 | -1.6605313   |
| Trmt1         | 0.2593           | 0.00658074     | -4.3198681 | -1.86207 | -1.7057945   |
| Mchr1         | 0.2593           | 0.00666077     | -4.307711  | -1.87374 | -1.4346678   |
| Ccl2          | 0.2595           | 0.0070657      | -4.248666  | -1.93076 | -3.4388849   |
| 4932438H23Rik | 0.26             | 0.00716303     | -4.2350495 | -1.944   | -1.0587788   |
| Ndc80         | 0.2614           | 0.00760487     | -4.1757924 | -2.002   | -1.6904625   |
| Kctd18        | 0.2659           | 0.00834673     | -4.0846402 | -2.09246 | -1.7070618   |
| Chaf1b        | 0.2661           | 0.00843087     | -4.0748893 | -2.10223 | -2.1476862   |
| Sbno2         | 0.2661           | 0.00854221     | -4.062156  | -2.11501 | -2.2394079   |
| Cd44          | 0.2672           | 0.00870222     | -4.0441842 | -2.13309 | -1.9847049   |
| Nrp2          | 0.2677           | 0.00883064     | -4.0300298 | -2.14738 | -2.0202183   |
| Bnip5         | 0.2691           | 0.00924995     | -3.9854004 | -2.19266 | -1.0659079   |
| Spice1        | 0.2698           | 0.00941904     | -3.9680507 | -2.21036 | -1.1102941   |
| Nfkb2         | 0.2698           | 0.00943531     | -3.9664004 | -2.21205 | -1.5264127   |
| Dnmt1         | 0.2727           | 0.01025938     | -3.8867847 | -2.294   | -1.1233129   |
| Sult6b2       | 0.2733           | 0.01112369     | -3.8107381 | -2.37335 | -1.0256339   |

|               |        |            |            |          |            |
|---------------|--------|------------|------------|----------|------------|
| Them6         | 0.2733 | 0.01127967 | -3.7977297 | -2.38703 | -1.0841643 |
| Clec5a        | 0.2733 | 0.01133364 | -3.7932763 | -2.39172 | -1.9809165 |
| Slc37a2       | 0.2733 | 0.01134893 | -3.7920185 | -2.39305 | -1.639927  |
| Pi15          | 0.2735 | 0.01158683 | -3.7726994 | -2.41344 | -2.0869761 |
| Fto           | 0.2737 | 0.01171627 | -3.7623762 | -2.42437 | -1.2393025 |
| Lrrc30        | 0.274  | 0.01180373 | -3.7554733 | -2.43169 | -1.0775784 |
| Ngf           | 0.274  | 0.01192291 | -3.7461598 | -2.44157 | -1.2018731 |
| Esco2         | 0.2753 | 0.01217428 | -3.7268584 | -2.46211 | -1.7230276 |
| Ccnf          | 0.2766 | 0.01239443 | -3.7103211 | -2.47975 | -1.8555053 |
| Crisp1        | 0.2788 | 0.01294253 | -3.6705526 | -2.5224  | -3.9477054 |
| Ccdc17        | 0.2805 | 0.01318609 | -3.6534875 | -2.54079 | -2.057333  |
| Lgals1        | 0.2811 | 0.01327594 | -3.6472822 | -2.54749 | -1.449836  |
| Zfp82         | 0.2817 | 0.01336505 | -3.6411748 | -2.55409 | -1.0249214 |
| Ccl20         | 0.2835 | 0.01377977 | -3.6133424 | -2.58425 | -3.7673725 |
| Gm48337       | 0.2836 | 0.0140763  | -3.5940155 | -2.60528 | -1.2813146 |
| Tnfrsf22      | 0.2837 | 0.01413488 | -3.5902519 | -2.60938 | -1.411219  |
| Lmna          | 0.2839 | 0.01422067 | -3.5847716 | -2.61536 | -1.0812782 |
| Mast2         | 0.2858 | 0.01522389 | -3.5233254 | -2.68276 | -1.239894  |
| Col3a1        | 0.2865 | 0.01541487 | -3.5121458 | -2.6951  | -1.5649528 |
| Gm49482       | 0.2865 | 0.01547876 | -3.5084405 | -2.69919 | -1.6394691 |
| Gm7400        | 0.2872 | 0.01567433 | -3.4972049 | -2.71162 | -3.2607537 |
| Spaca7        | 0.2872 | 0.01570795 | -3.4952893 | -2.71374 | -1.8872067 |
| Has2          | 0.2874 | 0.01578918 | -3.49068   | -2.71884 | -2.982886  |
| Pphln1        | 0.2884 | 0.01601    | -3.4782832 | -2.7326  | -1.1779891 |
| Tnfrsf18      | 0.2898 | 0.0168006  | -3.4354265 | -2.78035 | -1.3213549 |
| Cd84          | 0.2898 | 0.0168241  | -3.4341876 | -2.78173 | -1.3759197 |
| Sntg2         | 0.2898 | 0.01688969 | -3.4307401 | -2.78559 | -1.7461233 |
| Nrcam         | 0.2898 | 0.01698866 | -3.425566  | -2.79138 | -2.7820868 |
| Ltb4r1        | 0.2908 | 0.017224   | -3.4133972 | -2.80502 | -1.1784545 |
| Dscc1         | 0.2911 | 0.01740816 | -3.4040047 | -2.81556 | -1.7767323 |
| Nav1          | 0.2911 | 0.01744609 | -3.4020837 | -2.81772 | -1.3284824 |
| Tubgcp6       | 0.2911 | 0.01749766 | -3.3994799 | -2.82065 | -1.084898  |
| Hesx1         | 0.2915 | 0.017675   | -3.3905909 | -2.83065 | -2.916735  |
| Birc7         | 0.2925 | 0.01808222 | -3.3705525 | -2.85325 | -1.4652057 |
| Pdlim7        | 0.2936 | 0.0184722  | -3.3518317 | -2.87442 | -2.055806  |
| Rab37         | 0.2938 | 0.01864583 | -3.3436388 | -2.88371 | -1.3968799 |
| Myc           | 0.2938 | 0.01871243 | -3.3405188 | -2.88725 | -1.684058  |
| 4930503E14Rik | 0.2947 | 0.01895702 | -3.3291665 | -2.90014 | -2.2096739 |
| Ankrd66       | 0.2972 | 0.01975195 | -3.2933728 | -2.94093 | -1.7006867 |
| Clk2          | 0.2983 | 0.02021745 | -3.2731534 | -2.96407 | -1.0977907 |
| Dap           | 0.2983 | 0.02028647 | -3.2701999 | -2.96745 | -1.0280538 |
| Lcn2          | 0.2996 | 0.02072688 | -3.2516137 | -2.9888  | -4.511201  |
| Gm10375       | 0.3001 | 0.02083643 | -3.2470591 | -2.99403 | -5.7891703 |

|               |        |            |            |          |            |
|---------------|--------|------------|------------|----------|------------|
| Trappc9       | 0.3011 | 0.02181872 | -3.2073765 | -3.03982 | -3.1330536 |
| Aldh18a1      | 0.3013 | 0.02251448 | -3.1804564 | -3.07104 | -1.1194125 |
| Hoxc11        | 0.3022 | 0.02337404 | -3.1484511 | -3.1083  | -1.2536327 |
| Homer3        | 0.3022 | 0.02354683 | -3.1421758 | -3.11563 | -1.3583188 |
| Fam172a       | 0.3023 | 0.02379786 | -3.1331495 | -3.12618 | -1.0739024 |
| AY358078      | 0.304  | 0.02424237 | -3.1174232 | -3.14459 | -1.9980143 |
| Gm9597        | 0.3054 | 0.02510215 | -3.0878947 | -3.17927 | -2.4926111 |
| Osmr          | 0.3054 | 0.02511095 | -3.0875985 | -3.17961 | -1.3974306 |
| Aqp8          | 0.306  | 0.02542439 | -3.0771162 | -3.19196 | -2.3121675 |
| Cdkn3         | 0.3065 | 0.02555558 | -3.0727713 | -3.19708 | -1.2554613 |
| Has1          | 0.3067 | 0.02581578 | -3.0642268 | -3.20716 | -1.032692  |
| Plac8         | 0.3073 | 0.02601282 | -3.0578195 | -3.21473 | -1.6840287 |
| Stat3         | 0.3089 | 0.02662098 | -3.0383782 | -3.23773 | -1.0503728 |
| Spp1          | 0.309  | 0.02665643 | -3.0372599 | -3.23905 | -2.1068383 |
| Nuak2         | 0.3112 | 0.02796232 | -2.9971848 | -3.28665 | -1.0066782 |
| Plaur         | 0.3126 | 0.02916713 | -2.9620075 | -3.32863 | -2.249188  |
| Krt4          | 0.314  | 0.02992252 | -2.9407614 | -3.35408 | -1.2677365 |
| Suv39h2       | 0.3142 | 0.03043182 | -2.9267682 | -3.37088 | -1.0789353 |
| Tnfrsf12a     | 0.3144 | 0.03078167 | -2.9173052 | -3.38225 | -2.2695144 |
| Il34          | 0.315  | 0.03093066 | -2.913311  | -3.38706 | -1.7058051 |
| Pbk           | 0.316  | 0.03112274 | -2.9081927 | -3.39322 | -1.8112912 |
| Tafa5         | 0.3163 | 0.03121853 | -2.9056534 | -3.39627 | -1.5843374 |
| Sfrp4         | 0.3163 | 0.03125339 | -2.9047314 | -3.39738 | -1.9850477 |
| Gsdmc4        | 0.3164 | 0.03132998 | -2.9027096 | -3.39982 | -1.6152815 |
| Fgg           | 0.3167 | 0.03160992 | -2.895366  | -3.40867 | -2.5487697 |
| Kdelr3        | 0.3182 | 0.03209737 | -2.8827485 | -3.4239  | -1.4962087 |
| Cxadr         | 0.3219 | 0.03338352 | -2.8504433 | -3.46298 | -1.1268573 |
| Trim40        | 0.3246 | 0.03432444 | -2.8276648 | -3.49063 | -1.1711576 |
| Sgo1          | 0.3256 | 0.03484546 | -2.8153444 | -3.50561 | -1.7440704 |
| H2bc22        | 0.3278 | 0.03647047 | -2.778179  | -3.55093 | -1.9183963 |
| Fn1           | 0.3283 | 0.03662245 | -2.7747963 | -3.55506 | -1.7695847 |
| Fstl1         | 0.3315 | 0.03817051 | -2.7411907 | -3.59621 | -1.0765094 |
| Pea15a        | 0.3315 | 0.03828475 | -2.7387702 | -3.59918 | -1.0988799 |
| 1700001F09Rik | 0.3317 | 0.03834208 | -2.7375583 | -3.60067 | -4.9869337 |
| Dtx2          | 0.3317 | 0.03836202 | -2.7371373 | -3.60118 | -1.3657479 |
| Olfr166       | 0.3327 | 0.03895146 | -2.7247988 | -3.61633 | -1.7017377 |
| Myof          | 0.3345 | 0.03979062 | -2.7075807 | -3.6375  | -1.4114916 |
| Grp           | 0.3353 | 0.04028241 | -2.6976731 | -3.6497  | -3.8341838 |
| Mt2           | 0.3353 | 0.04042216 | -2.6948819 | -3.65314 | -1.7703597 |
| Ccna2         | 0.3366 | 0.04097913 | -2.6838607 | -3.66672 | -1.9371533 |
| Gm13669       | 0.3387 | 0.0418565  | -2.6668266 | -3.68775 | -1.000326  |
| Rbm3          | 0.3389 | 0.04200392 | -2.6640027 | -3.69124 | -1.0635803 |
| Samd4         | 0.3405 | 0.04265022 | -2.6517482 | -3.70639 | -1.435103  |

|          |        |            |            |          |            |
|----------|--------|------------|------------|----------|------------|
| Npw      | 0.3416 | 0.04291403 | -2.6468041 | -3.71251 | -1.1072733 |
| Sema6d   | 0.3434 | 0.04374002 | -2.6315352 | -3.73142 | -1.2583199 |
| Syn1     | 0.3449 | 0.04442428 | -2.6191216 | -3.74681 | -1.8033381 |
| Adgrg2   | 0.3452 | 0.04456429 | -2.6166072 | -3.74993 | -1.0857909 |
| Pkdrej   | 0.3452 | 0.04465148 | -2.6150457 | -3.75187 | -1.0613961 |
| Fam219b  | 0.3456 | 0.04497022 | -2.6093654 | -3.75892 | -1.1445179 |
| Gbx2     | 0.3464 | 0.0456048  | -2.5981855 | -3.77281 | -1.1375366 |
| Sh3bgrl3 | 0.3469 | 0.04585838 | -2.5937651 | -3.7783  | -1.2412593 |
| Pnma2    | 0.3472 | 0.04600762 | -2.5911757 | -3.78152 | -1.0471924 |
| Tmpo     | 0.3485 | 0.0468097  | -2.5774144 | -3.79864 | -1.204487  |
| Tsc22d1  | 0.3488 | 0.04702514 | -2.5737617 | -3.80319 | -1.231494  |
| Fancb    | 0.349  | 0.0476301  | -2.5636007 | -3.81585 | -1.1216491 |
| Cd200r1  | 0.3497 | 0.0479746  | -2.5578765 | -3.82298 | -1.0617788 |
| Noc2l    | 0.3507 | 0.04896275 | -2.5417011 | -3.84316 | -1.0854161 |

---
